# Supplementary material for: High niche diversity in Mesozoic pollinating lacewings
Source: PubMed Central journal article supplement (PMC6141599; doi:10.1038/s41467-018-06120-5), 2018-09-17
Supplement: 41467_2018_6120_MOESM3_ESM.pdf [file 41467_2018_6120_MOESM3_ESM.pdf]

## **Description of Additional Supplementary Files**

**File Name:** Supplementary Data 1

**Description:** Matrix.

**File Name:** Supplementary Data 2

**Description:** Matrix with estimated codes.
